# Supplementary material
Source: ML conference proceedings conference paper supplement (https://proceedings.neurips.cc/paper_files/paper/2019/hash/967c2ae04b169f07e7fa8fdfd110551e-Abstract.html)
Supplement: Supplementary file [file 967c2ae04b169f07e7fa8fdfd110551e-Supplemental.zip]

# Appendix for Kernelized Bayesian Softmax for Text Generation

Ning Miao Hao Zhou Chengqi Zhao Wenxian Shi Lei Li  
ByteDance AI lab

{miaoning,zhouhao.nlp,zhaochengqi.d,shiwenxian,lileilab}@bytedance.com

## A Proofs

**Lemma A.1.** *KerBS has the ability to learn the multi-sense property. If the real distribution of context vectors is composed of several disconnected parts, KerBS components will learn to represent as many as these parts.*

*Proof.* We only prove the simplest situation under traditional inner product kernel. We assume that the real context vectors of the  $i$ -th word are composed of two disconnected parts and it is also allocated with two KerBS senses. We also assume that part 1 has already been represented by sense  $\langle i, 1 \rangle$ , i.e.,  $P(s = \langle i, 1 \rangle | y = i) \rightarrow 1$  for  $h_1$  in part 1. Then for the second newly allocated sense  $\langle i, 2 \rangle$ , we find

$$\frac{\partial \mathcal{L}}{\partial w_i^2} = \sum_{h_1} \frac{\partial \log(\text{Softmax}(h_1 \cdot w_i^2))}{\partial w_i^2} + \sum_{h_2} \frac{\partial \log(\text{Softmax}(h_2 \cdot w_i^2))}{\partial w_i^2} \quad (1)$$

$$= \sum_{h_1} \frac{R_1 \exp(h_1 \cdot w_i^2) h_1}{(\exp(h_1 \cdot w_i^1) + \exp(h_1 \cdot w_i^2))(\exp(h_1 \cdot w_i^1) + \exp(h_1 \cdot w_i^2) + R_1)} \quad (2)$$

$$+ \sum_{h_2} \frac{R_2 \exp(h_2 \cdot w_i^2) h_2}{(\exp(h_2 \cdot w_i^1) + \exp(h_2 \cdot w_i^2))(\exp(h_2 \cdot w_i^1) + \exp(h_2 \cdot w_i^2) + R_2)}, \quad (3)$$

where  $h_1$  and  $h_2$  are context vectors in part 1 and 2, respectively.  $R_i = \sum \exp(h_i \cdot w_j^k)$  for all senses except  $\langle i, 1 \rangle$  and  $\langle i, 2 \rangle$ . As part 1 has already be well represented by sense  $\langle i, 1 \rangle$ ,  $\exp(h_1 \cdot w_i^1)$  should be much larger than  $\exp(h_1 \cdot w_i^2)$ .

Then

$$\frac{\exp(h_1 \cdot w_i^2)}{\exp(h_1 \cdot w_i^1) + \exp(h_1 \cdot w_i^2)} < \epsilon. \quad (4)$$

As a result part 1's attraction (line 2) to  $w_i^2$  is much smaller than part 2 (line 3), and  $w_i^2$  will move towards part 2.

□

**Lemma A.2.** *KerBS has the ability to learn model variances. For distributions with larger variances, KerBS learns larger  $\theta$ .*

*Proof.* We will only give a heuristic proof for the situation where  $\theta$  is a small positive number. The proof is also done under single-sense condition. If  $\theta$  is in other intervals, the proof will be more complex, but the ideas are the same.

From the definition of  $\mathcal{L}$ ,

$$\mathcal{L} = \sum_t \log(P(y_t = \hat{y}_t; \theta)), \quad (5)$$

where  $\hat{y}_t$  is the the expected output for  $y_t$ , and we temporarily hide other parameters.

We can derive the partial derivative of  $\mathcal{L}$  with respect to  $\theta_i$ :

$$\frac{\partial \mathcal{L}}{\partial \theta_i} = \sum_{t, \hat{y}_t=i} (1 - P(y_t = i)) \frac{\partial \mathcal{K}_\theta(h_t, w_i)}{\partial \theta_i} - \sum_{t, \hat{y}_t \neq i} P(y_t = i) \frac{\partial \mathcal{K}_\theta(h_t, w_i)}{\partial \theta_i}. \quad (6)$$

When  $\theta$  is small, we can approximate  $a$  by the following equation:

$$a = \frac{-\theta}{2(\exp(-\theta) + \theta - 1))} \approx \frac{-\theta}{2(1 - \theta + \frac{\theta^2}{2} + \theta - 1)))} = -\frac{1}{\theta}. \quad (7)$$

Approximately,

$$\mathcal{K}_\theta(h_t, w_i) \propto -\frac{1}{\theta_i} (\exp(-\theta_i \cos_t) - 1), \quad (8)$$

$$\frac{\partial \mathcal{K}_\theta(h_t, w_i)}{\partial \theta_i} \propto \frac{1}{\theta_i^2} (\exp(-\theta_i \cos_t) - 1) - \frac{1}{\theta_i} (-\cos_t \exp(-\theta_i \cos_t)), \quad (9)$$

where  $\cos(h_t, w_i)$  is abbreviated as  $\cos_t$ .

Because  $\cos(h_t, w_i)$  is usually small for  $\hat{y}_t \neq i$  we can ignore the second part of Eq. (6). So the optimal value for  $\theta$  is approximately a solution to Eq. (10).

$$\sum_{t, \hat{y}_t=i} (1 - P(y_t = i)) \frac{\partial \mathcal{K}_\theta(h_t, w_i)}{\partial \theta_i} = 0. \quad (10)$$

Then,

$$F = \sum_{t, \hat{y}_t=i} (1 - P(y_t = i)) \underbrace{(\exp(-\theta_i \cos_t) - 1 + \theta_i \cos_t \exp(-\theta_i \cos_t))}_{F_1} = 0, \quad (11)$$

Hence, when  $\cos_t$  gets smaller,  $\theta_i$  tends to increase, since  $\frac{\partial F_1}{\partial \cos_t} \frac{\partial F_1}{\partial \theta_i} > 0$  when  $\cos_t > 0$  and  $\cos_t$  is usually positive when  $\hat{y}_t = i$ . So when distribution variance increases,  $\cos_t$  tends to decrease, because context vectors are farther from the mean vector. As a result,  $\theta_i$  will increase.  $\square$

## B Experiment Details

**Scoring Standard for Human Evaluation** The volunteers are asked to score responses generated by all models according to the following standard:

- Score 0 : response which is neither fluent nor relative to the input question.
- Score 1 : response which is either fluent or relative to the input question, but not both.
- Score 2 : response which is both fluent and relative to the input question.
